# Supplementary material for: Evaluating the Skin Interactions and Permeation of Alginate/Fucoidan Hydrogels Per Se and Associated with Different Essential Oils
Source: MDPI journal article supplement (doi:10.3390/pharmaceutics15010190), 2023-01-05
Supplement: s1 [file s1]

Supplementary Material

# Evaluating the Skin Interactions and Permeation of Alginate/Fucoidan Hydrogels *Per Se* and Associated with Different Essential Oils

Ana Isabel Barbosa <sup>1</sup>, Sofia A. Costa Lima <sup>2,\*</sup>, Ibraheem Yousef <sup>3</sup> and Salette Reis <sup>1</sup>

<sup>1</sup> LAQV, REQUIMTE, Departamento de Ciências Químicas, Faculdade de Farmácia, Universidade do Porto, Rua de Jorge Viterbo Ferreira, 228, 4050-313 Porto, Portugal

<sup>2</sup> LAQV, REQUIMTE, Departamento de Química, Instituto de Ciências Biomédicas de Abel Salazar, Universidade do Porto, Rua de Jorge Viterbo Ferreira, 228, 4050-313 Porto, Portugal

<sup>3</sup> ALBA Synchrotron, Carrer de la Llum 2-26, Cerdanyola del Vallès, 08290 Barcelona, Spain

\* Correspondence: [slima@icbas.up.pt](mailto:slima@icbas.up.pt)

**Table S1.** Evaluation of lipid scissoring band shifts in all essential oils and essential oil-enriched hydrogels in comparison to the untreated sample.

|                            | Scissoring  |      |
|----------------------------|-------------|------|
| Menthol                    | 1454        | 1468 |
| Linalool                   | 1452        | 1468 |
| Bergamot                   | 1452        | 1468 |
| Pinene                     | 1452        | 1468 |
| Untreated                  | 1454        | 1468 |
| Alginate/fucoidan          | 1454        | 1468 |
| Menthol-alginate/fucoidan  | 1454        | 1469 |
| Linalool-alginate/fucoidan | 1452        | 1468 |
| Bergamot-alginate/fucoidan | <b>1456</b> | 1468 |
| Pinene-alginate/fucoidan   | 1452        | 1468 |

**Citation:** Barbosa, A.I.; Lima, S.A.C.; Yousef, I.; Reis, S. Evaluating the Skin Interactions and Permeation of Alginate/Fucoidan Hydrogels *Per Se* and Associated with Different Essential Oils. *Pharmaceutics* **2023**, *15*, 190. <https://doi.org/10.3390/pharmaceutics15010190>

Academic Editor: Thierry Vandamme

Received: 3 December 2022

Revised: 27 December 2022

Accepted: 30 December 2022

Published: 5 January 2023

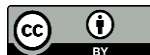

**Copyright:** © 2023 by the authors. Licensee MDPI, Basel, Switzerland. This article is an open access article distributed under the terms and conditions of the Creative Commons Attribution (CC BY) license (<https://creativecommons.org/licenses/by/4.0/>).

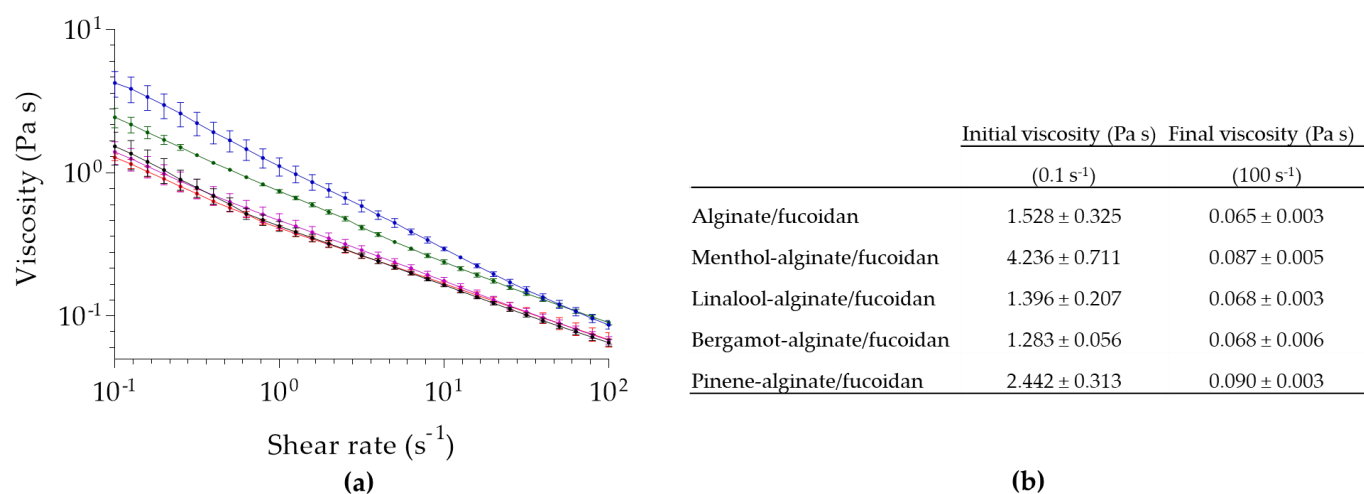

**Figure S1.** Analysis of (a) viscosity as a function of shear rate of alginate/fucoidan (black), menthol-alginate/fucoidan (blue), linalool-alginate/fucoidan (magenta), bergamot-alginate/fucoidan (red) and pinene-alginate/fucoidan (green). Calculated values of initial (minimum shear rate –  $0.1 s^{-1}$ ) and final (maximum shear rate –  $100 s^{-1}$ ) viscosity (b). Data expressed as mean  $\pm$  SD of  $n=3$  different hydrogel batches.

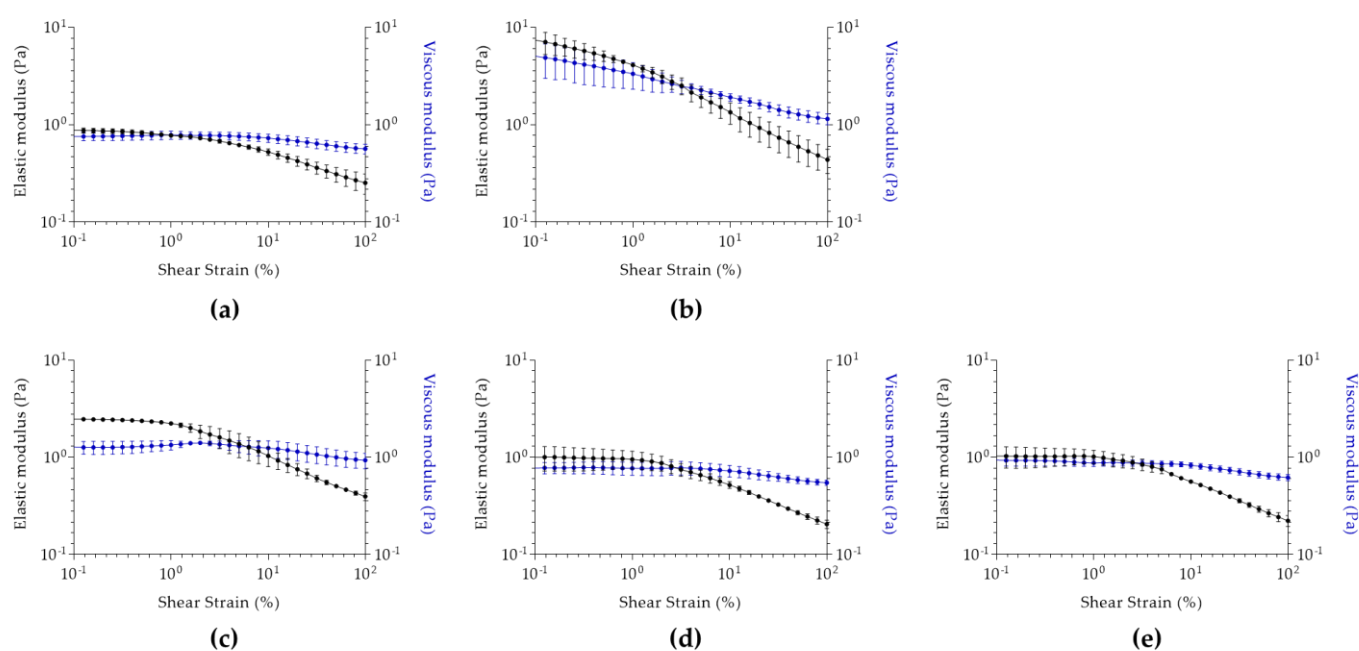

**Figure S2.** Resistance to deformation analysis from determination of linear viscoelastic region of (a) alginate/fucoidan, (b) menthol-alginate/fucoidan, (c) linalool-alginate/fucoidan, (d) bergamot-alginate/fucoidan and (e) pinene-alginate/fucoidan. Data expressed as mean  $\pm$  SD of  $n=3$  different hydrogel batches.

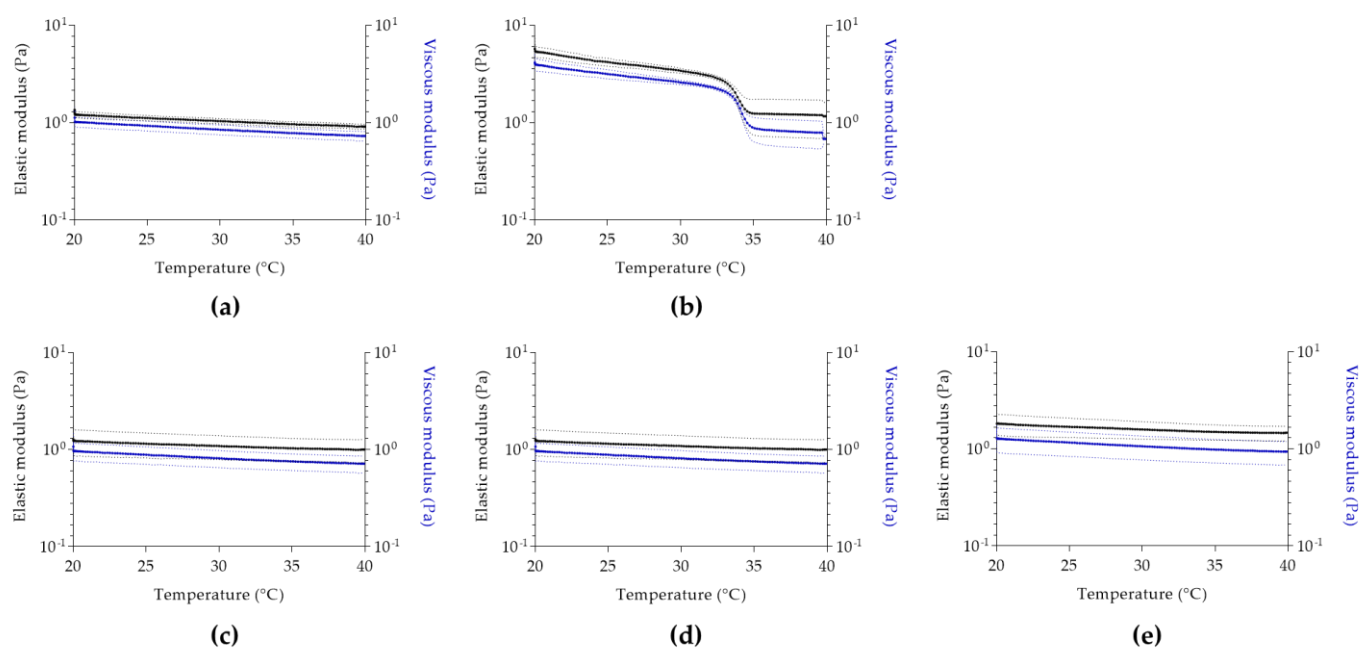

**Figure S3.** Resistance to temperature ramp from 20 to 40 °C of (a) alginate/fucoidan, (b) menthol-alginate/fucoidan, (c) linalool-alginate/fucoidan, (d) bergamot-alginate/fucoidan and (e) pinene-alginate/fucoidan. Data expressed as mean  $\pm$  SD of  $n=3$  different hydrogel batches.

**Disclaimer/Publisher's Note:** The statements, opinions and data contained in all publications are solely those of the individual author(s) and contributor(s) and not of MDPI and/or the editor(s). MDPI and/or the editor(s) disclaim responsibility for any injury to people or property resulting from any ideas, methods, instructions or products referred to in the content.
